# Supplementary material for: Peripheral inflammation promotes brain tau transmission via disrupting blood–brain barrier
Source: PubMed Central journal article supplement (PMC7033313; doi:10.1042/bsr20193629), 2020-02-20
Supplement: BSR-2019-3629_supp.pdf [file BSR-2019-3629_supp.pdf]

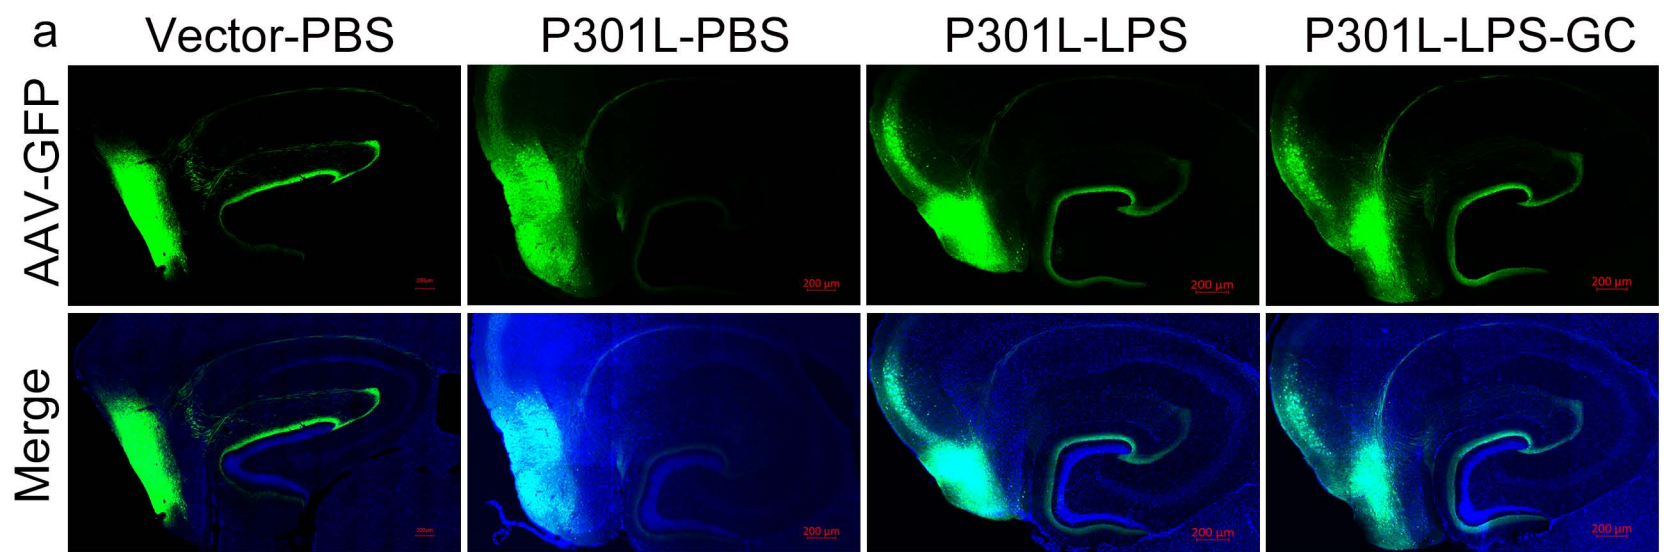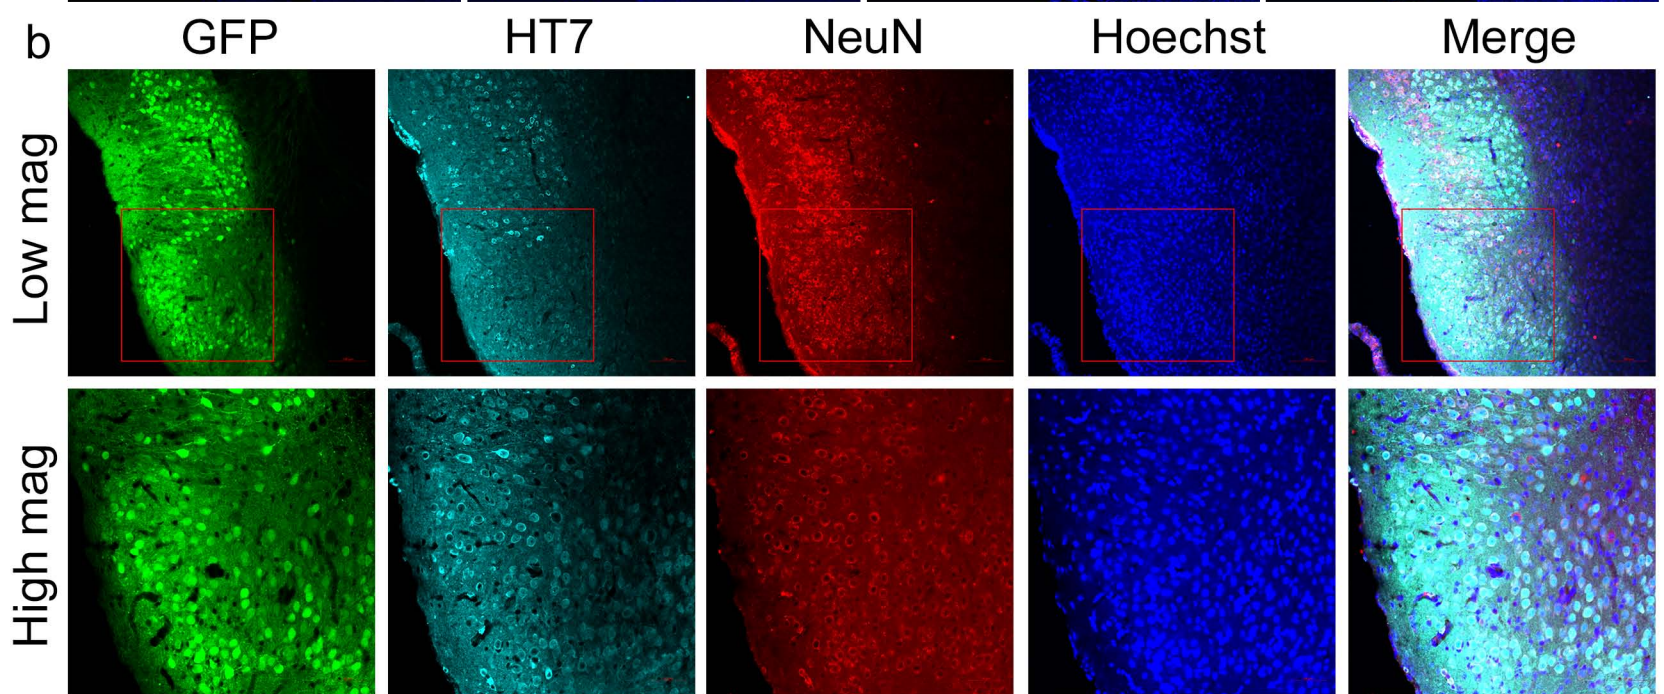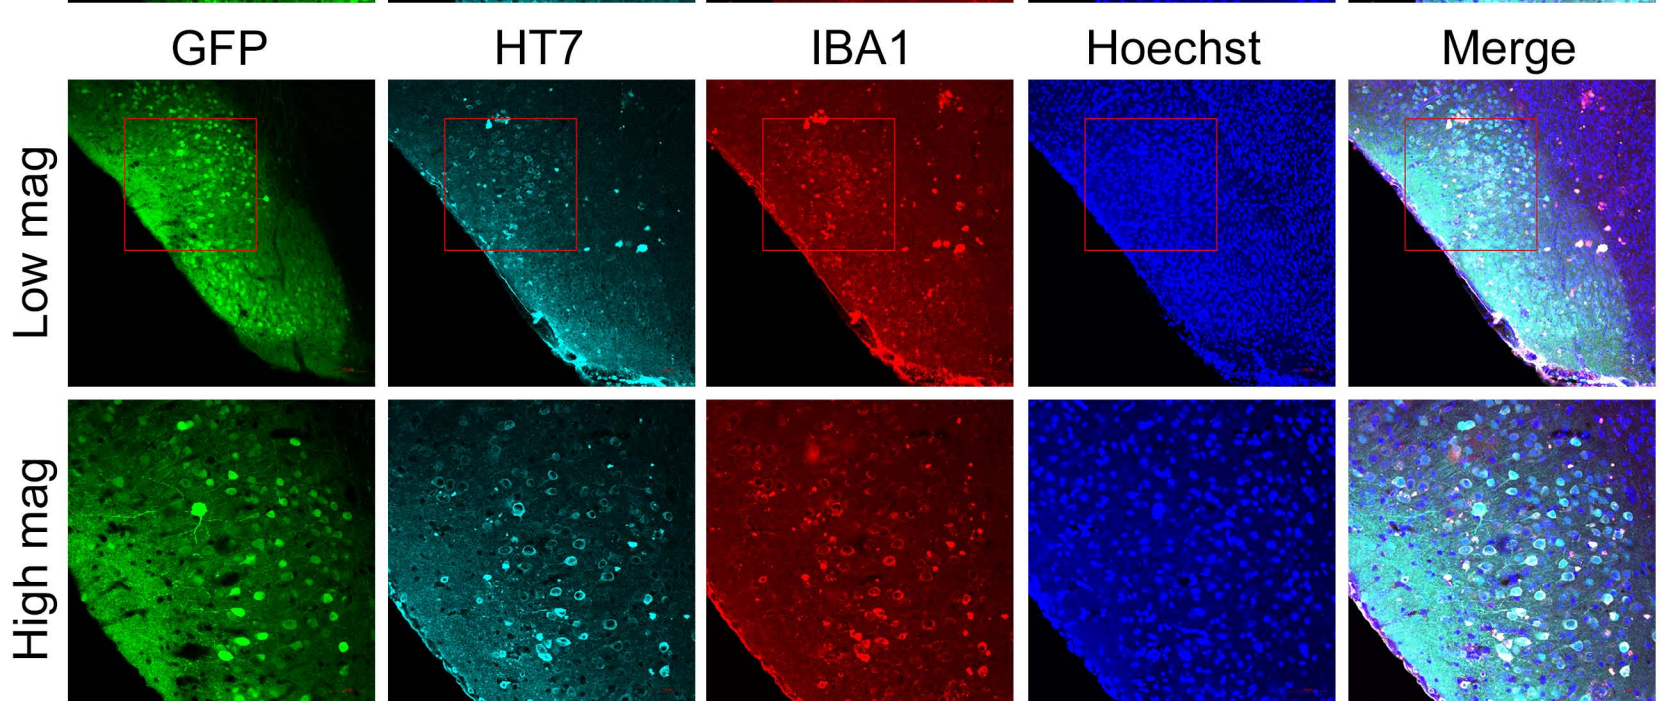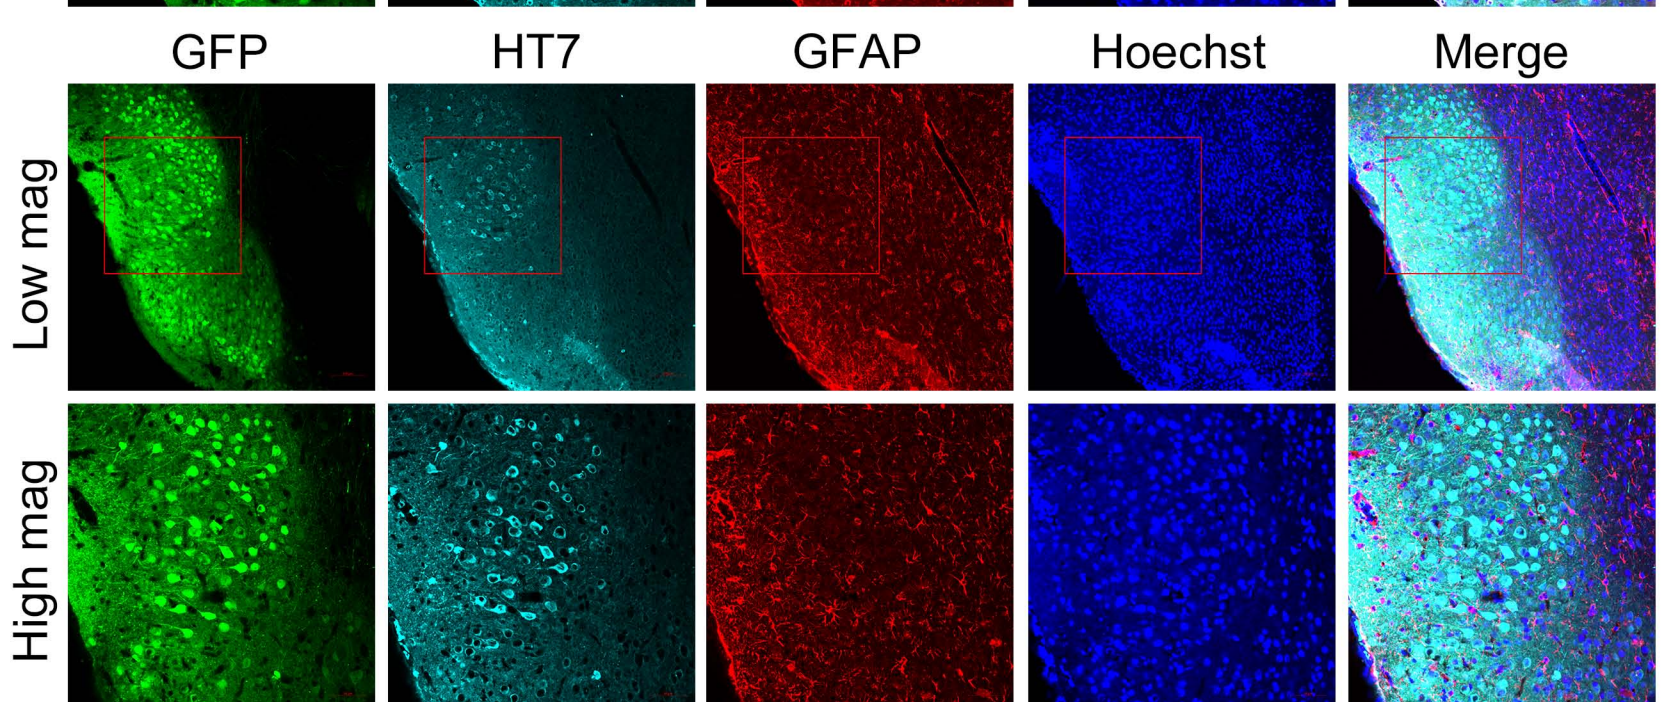

**Supplementary Figure S1. Images showed the location, where the AAV-expressed tau was none-selectively detected, for each injection across the groups.** (a) The initial site of injection was showed at low enough magnification by immunofluorescence staining using GFP (green) and Hoechst (blue). (b) The AAV-expressed tau was none-selectively detected in the EC subset by co-immunofluorescence staining of HT7 (cyan) and NeuN (red), or HT7 (cyan) and IBA1 (red), or HT7(cyan) and GFAP (red).

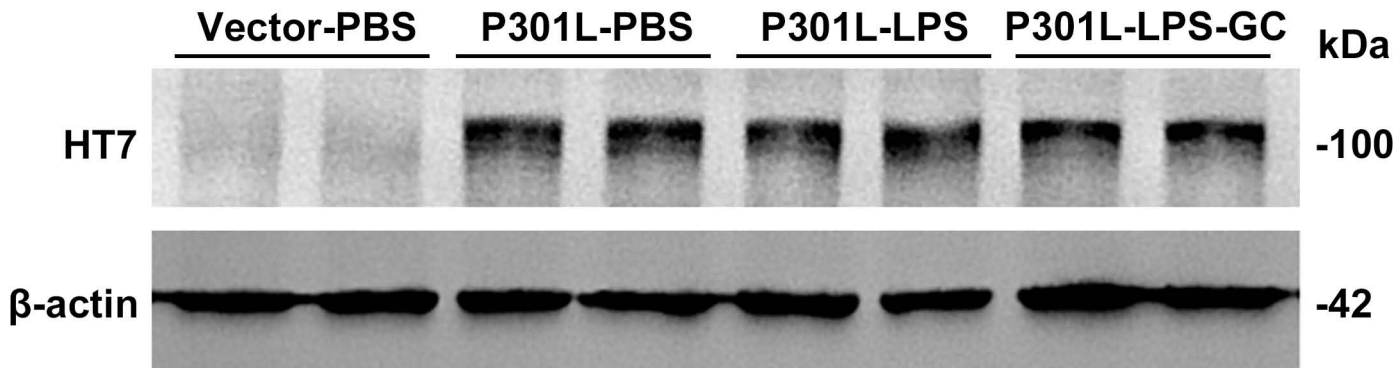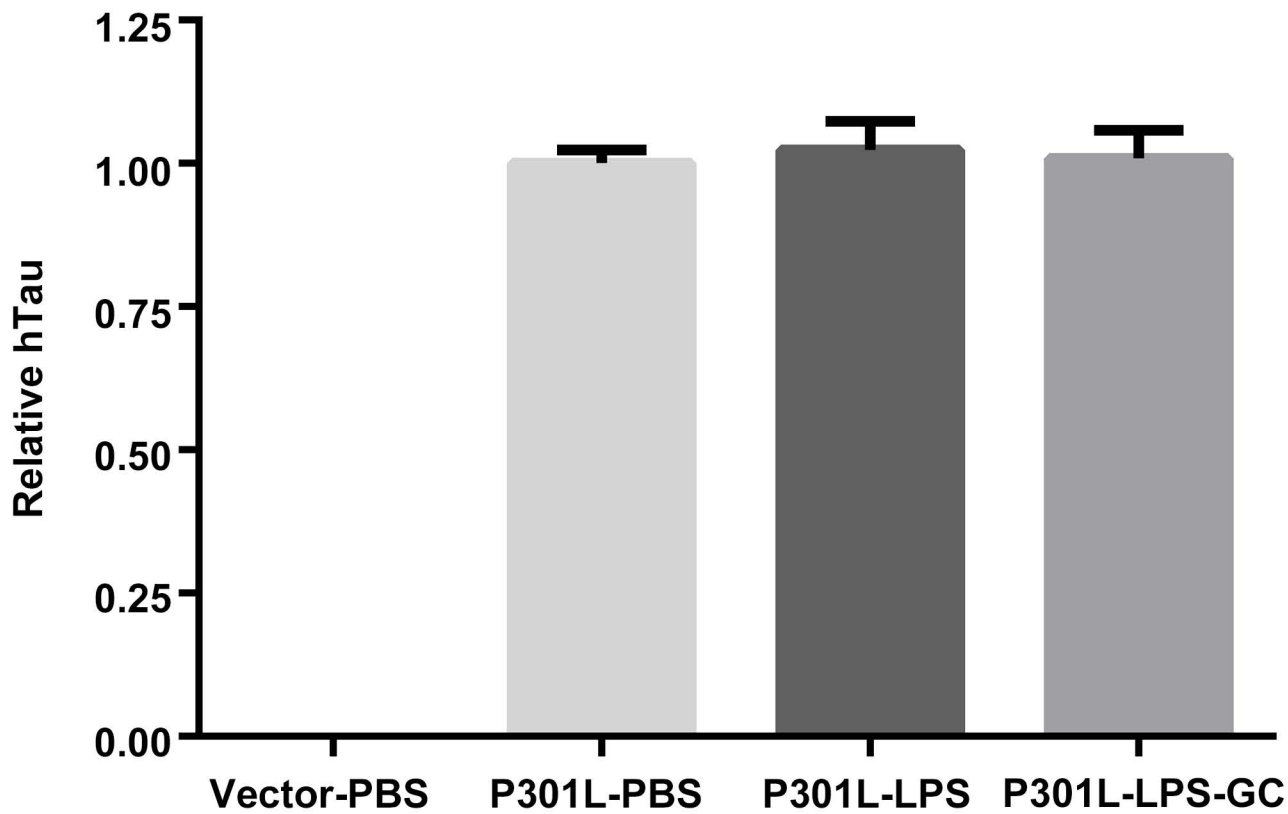

**Supplementary Figure S2. Similar level of hTau was detected in EC subset in the three P301L groups.** Brain tissue lysates in the EC subset were detected by Western blotting. Data were presented as mean  $\pm$  SD (n=4 each group, one-way ANOVA followed by Tukey *post hoc* test).

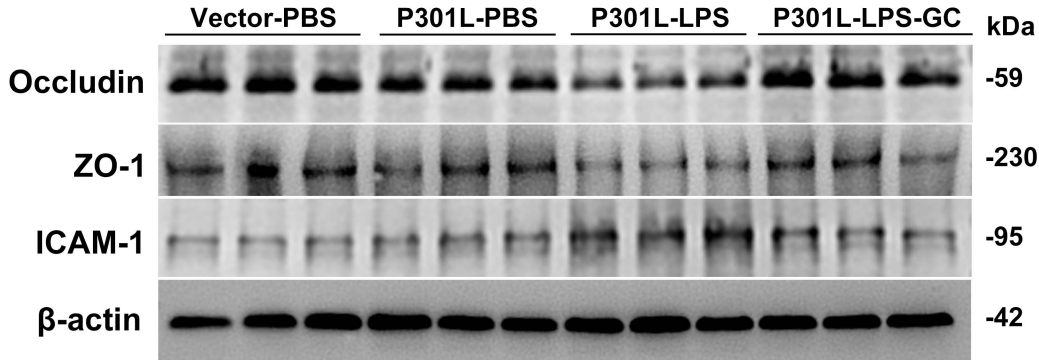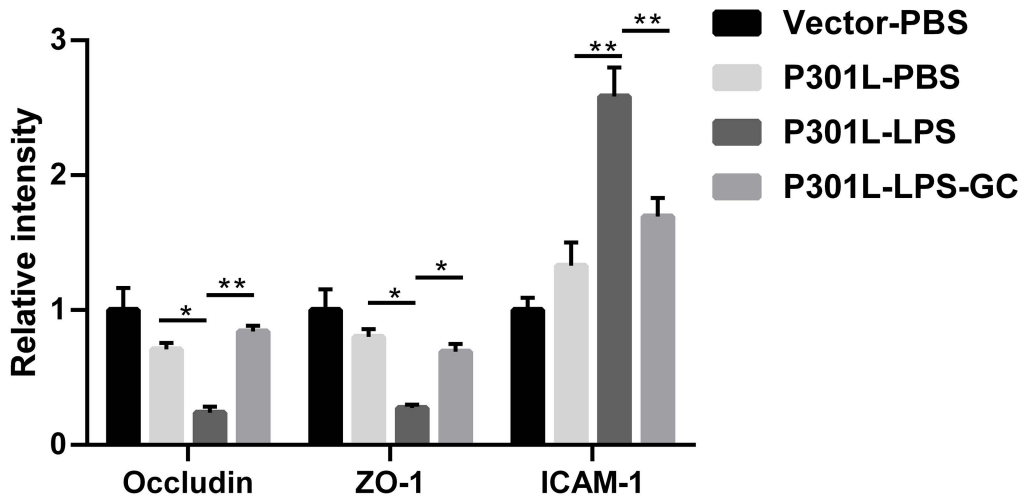

**Supplementary Figure S3. Occludin, ZO-1 and ICAM-1 were detected in the hippocampus in the four groups.** Brain tissue lysates in the hippocampus were detected by Western blotting. Data were presented as mean  $\pm$  SEM (n=3 each group, two-way ANOVA followed by Tukey *post hoc* test). \*, P<0.05; \*\*, P<0.01.
